# Supplementary material
Source: PubMed Central journal article supplement (PMC8336071)
Supplement: NIHMS1727427-supplement-Supplementary_material.pdf [file NIHMS1727427-supplement-Supplementary_material.pdf]

## Supplemental Information for

### Combination of Two Analytical Techniques Improves Wine **Classification** by Vineyard, Region, and Vintage

Alexandra A. Crook,<sup>a,†</sup> Diana Zamora-Olivares,<sup>c,d,†</sup> Fatema Bhinderwala,<sup>a,b,†</sup> Jade Woods,<sup>a</sup> Michelle Winkler,<sup>d</sup> Sebastian Rivera,<sup>d</sup> Cassandra E. Shannon,<sup>d</sup> Holden R. Wagner,<sup>d</sup> Deborah L. Zhuang,<sup>d</sup> Jessica E. Lynch,<sup>d</sup> Nathan R. Berryhill,<sup>d</sup> Ron C. Runnebaum,<sup>e,\*</sup> Eric Anslyn,<sup>c,\*</sup> and Robert Powers,<sup>a,b,\*</sup>

<sup>a</sup> Department of Chemistry, University of Nebraska-Lincoln, Lincoln NE 68888, United States

<sup>b</sup> Nebraska Center for Integrated Biomolecular Communication, University of Nebraska-Lincoln, Lincoln NE 68588, United States

<sup>c</sup> Department of Chemistry, The University of Texas at Austin, Austin, Texas 78712, United States

<sup>d</sup> Texas Institute for Discovery Education in Science and Freshman Research Initiative, The University of Texas at Austin, Austin, Texas 78712, United States.

<sup>e</sup> Department of Viticulture and Enology, and Department of Chemical Engineering, University of California–Davis, Davis, California 95616, United States

<sup>f</sup> Current Affiliation: Department of Structural Biology, University of Pittsburgh School of Medicine, 3501 Fifth Avenue, Pittsburgh, PA 15261, United States of America

<sup>†</sup>equal contribution

\*To whom correspondence should be addressed:

Robert Powers  
University of Nebraska-Lincoln  
Department of Chemistry  
722 Hamilton Hall  
Lincoln, NE 68588-0304  
Email: [rpowers3@unl.edu](mailto:rpowers3@unl.edu)  
Phone: (402) 472-3039  
Fax: (402) 472-9402  
ORCID: 0000-0001-9948-6837

Eric Anslyn  
The University of Texas at Austin  
Department of Chemistry  
Austin, Texas 76712  
Email: [anslyn@austin.utexas.edu](mailto:anslyn@austin.utexas.edu)  
Phone: 512-471-0068  
Fax: (512) 471-7791  
ORCID: 0000-0002-5137-8797

Ron Runnebaum  
University of California–Davis  
Department of Viticulture & Enology  
Department of Chemical Engineering  
Davis, CA 95616  
Email: [rcrunnebaum@ucdavis.edu](mailto:rcrunnebaum@ucdavis.edu)  
Phone: (530) 752-9078  
ORCID: 0000-0001-5872-8596

## Contents

### Tables:

**Table S1.** Binding Ratios of DS array Sensing Ensembles.

**Table S2.** 2015 Vineyard MB-PCA p-value Matrix

**Table S3.** 2016 Vineyard MB-PCA p-value Matrix

**Table S4.** 2015 AVA Region NMR p-value Matrix

**Table S5.** 2016 AVA Region NMR p-value Matrix

### Figure:

**Figure S1.** Multivariate Analysis of NMR and DS Array Datasets

**Figure S2.** AVA Region Multivariate Analysis of DS Array Datasets

**Figure S3.** Vineyard and AVA Region Univariate Analysis.

**Figure S4.** Vintage Univariate Analysis.

**Table S1.** Binding Ratios of the DS Array Ensembles.

| Sensor Code | Sensing ensemble            | Indicator (mM) | Binding ratio<br>[Peptide:Metal:Indicator] |
|-------------|-----------------------------|----------------|--------------------------------------------|
| MM1         | RN8-Cu <sup>2+</sup> -PCV   | 0.075          | 0.5:1:1                                    |
| MM2         | TT2-Cu <sup>2+</sup> - PCV  | 0.075          | 0.5:1:1                                    |
| MM3         | SEL1-Cu <sup>2+</sup> - PCV | 0.075          | 1:1:1                                      |
| MM4         | RN8-Cu <sup>2+</sup> -CAS   | 0.06           | 0.4:1:1                                    |
| MM5         | TT2-Cu <sup>2+</sup> - CAS  | 0.06           | 0.4:1:1                                    |
| MM6         | SEL1-Cu <sup>2+</sup> - CAS | 0.06           | 0.5:1:1                                    |
| MM7         | RN8-Ni <sup>2+</sup> - BPR  | 0.018          | 1:1:1                                      |
| MM8         | TT2-Ni <sup>2+</sup> - BPR  | 0.018          | 0.4:1:1                                    |
| MM9         | SEL1-Ni <sup>2+</sup> - BPR | 0.018          | 0.75:1:1                                   |

**Table S2.** 2015 Vineyard MB-PCA p-value Matrix

|      | SMV2     | SRH1     | AS1      | AS2      | SNC1     | SNC2     | CRN1     | RRV1     | RRV2     | RRV3     | AV1      | AV2      | OR1      | OR2      |
|------|----------|----------|----------|----------|----------|----------|----------|----------|----------|----------|----------|----------|----------|----------|
| SMV1 | 2.84E-10 | 1.68E-08 | 7.15E-03 | 9.27E-10 | 1.00E-07 | 1.74E-09 | 5.04E-07 | 4.20E-07 | 5.78E-10 | 1.13E-08 | 5.30E-03 | 4.23E-09 | 1.78E-08 | 5.68E-07 |
| SMV2 |          | 4.21E-04 | 1.28E-07 | 9.53E-06 | 6.47E-11 | 8.34E-13 | 2.55E-11 | 5.49E-07 | 6.46E-13 | 1.67E-12 | 4.35E-04 | 4.68E-13 | 2.49E-13 | 3.97E-11 |
| SRH1 |          |          | 1.68E-07 | 2.83E-06 | 1.33E-09 | 8.21E-13 | 5.71E-10 | 2.79E-05 | 8.14E-13 | 2.44E-12 | 9.31E-03 | 1.79E-11 | 2.78E-10 | 4.92E-07 |
| AS1  |          |          |          | 4.16E-09 | 8.00E-08 | 1.59E-10 | 9.62E-07 | 4.93E-05 | 6.81E-10 | 1.67E-10 | 4.47E-01 | 3.39E-07 | 1.26E-06 | 2.90E-07 |
| AS2  |          |          |          |          | 4.18E-10 | 1.00E-12 | 7.81E-11 | 4.46E-08 | 6.34E-13 | 4.85E-13 | 4.74E-06 | 4.45E-11 | 3.66E-11 | 6.27E-09 |
| SNC1 |          |          |          |          |          | 1.26E-06 | 1.27E-05 | 5.41E-10 | 7.43E-06 | 9.24E-07 | 5.37E-06 | 5.43E-07 | 1.75E-05 | 4.80E-09 |
| SNC2 |          |          |          |          |          |          | 1.95E-06 | 1.55E-10 | 1.42E-06 | 2.34E-07 | 2.58E-06 | 4.84E-10 | 1.64E-08 | 3.92E-12 |
| CRN1 |          |          |          |          |          |          |          | 9.49E-10 | 1.86E-04 | 1.29E-08 | 1.54E-03 | 8.87E-05 | 8.08E-02 | 1.53E-06 |
| RRV1 |          |          |          |          |          |          |          |          | 3.49E-11 | 3.37E-10 | 1.08E-04 | 4.44E-12 | 4.06E-11 | 3.84E-08 |
| RRV2 |          |          |          |          |          |          |          |          |          | 6.92E-09 | 1.02E-03 | 6.61E-05 | 5.95E-07 | 4.45E-11 |
| RRV3 |          |          |          |          |          |          |          |          |          |          | 3.06E-07 | 3.70E-11 | 1.77E-09 | 5.47E-12 |
| AV1  |          |          |          |          |          |          |          |          |          |          |          | 7.61E-09 | 5.52E-07 | 1.88E-08 |
| AV2  |          |          |          |          |          |          |          |          |          |          |          |          | 4.37E-05 | 7.71E-10 |
| OR1  |          |          |          |          |          |          |          |          |          |          |          |          |          | 1.32E-07 |

**Table S3.** 2016 Vineyard MB-PCA p-value Matrix

|      | SMV2     | SRH1     | AS1      | AS2      | SNC1     | SNC2     | CRN1     | RRV1     | RRV2     | RRV3     | AV1      | AV2      | OR1      | OR2      |
|------|----------|----------|----------|----------|----------|----------|----------|----------|----------|----------|----------|----------|----------|----------|
| SMV1 | 6.98E-06 | 2.36E-05 | 8.12E-06 | 1.00E-10 | 2.88E-07 | 1.80E-08 | 1.42E-11 | 4.27E-06 | 6.14E-09 | 4.25E-07 | 1.26E-11 | 4.41E-08 | 5.23E-10 | 2.02E-09 |
| SMV2 |          | 8.77E-08 | 7.38E-09 | 1.49E-11 | 5.36E-08 | 2.60E-06 | 3.69E-07 | 2.12E-08 | 5.18E-05 | 1.87E-08 | 1.74E-10 | 1.88E-05 | 2.35E-06 | 2.70E-05 |
| SRH1 |          |          | 2.10E-05 | 2.40E-09 | 2.82E-08 | 8.44E-11 | 2.89E-13 | 3.44E-04 | 2.10E-11 | 4.09E-04 | 2.66E-11 | 1.38E-09 | 5.61E-11 | 1.70E-09 |
| AS1  |          |          |          | 6.98E-11 | 1.99E-09 | 2.85E-09 | 3.85E-11 | 1.99E-02 | 9.24E-11 | 1.22E-08 | 1.37E-11 | 1.23E-09 | 5.20E-11 | 2.39E-11 |
| AS2  |          |          |          |          | 3.12E-13 | 3.11E-13 | 1.11E-15 | 2.51E-08 | 6.46E-13 | 4.06E-10 | 3.52E-12 | 8.21E-12 | 1.38E-13 | 1.12E-13 |
| SNC1 |          |          |          |          |          | 1.01E-06 | 1.80E-11 | 5.82E-09 | 9.44E-09 | 6.88E-08 | 8.88E-09 | 2.14E-09 | 3.82E-10 | 1.53E-07 |
| SNC2 |          |          |          |          |          |          | 2.09E-07 | 2.33E-09 | 5.48E-06 | 5.46E-08 | 1.35E-07 | 4.55E-10 | 1.31E-06 | 3.30E-08 |
| CRN1 |          |          |          |          |          |          |          | 5.03E-11 | 1.65E-04 | 1.64E-10 | 6.92E-08 | 5.93E-10 | 1.01E-04 | 7.11E-12 |
| RRV1 |          |          |          |          |          |          |          |          | 1.08E-09 | 2.07E-08 | 5.57E-11 | 1.34E-08 | 4.89E-11 | 5.01E-10 |
| RRV2 |          |          |          |          |          |          |          |          |          | 9.49E-10 | 2.17E-13 | 3.74E-13 | 1.60E-03 | 3.70E-13 |
| RRV3 |          |          |          |          |          |          |          |          |          |          | 4.63E-09 | 1.70E-09 | 3.71E-10 | 5.56E-09 |
| AV1  |          |          |          |          |          |          |          |          |          |          |          | 1.82E-09 | 3.90E-08 | 3.52E-07 |
| AV2  |          |          |          |          |          |          |          |          |          |          |          |          | 1.15E-07 | 4.87E-05 |
| OR1  |          |          |          |          |          |          |          |          |          |          |          |          |          | 4.66E-07 |

**Table S4. 2015 AVA Region NMR p-value Matrix**

|     | SRH      | AS       | SNC      | CRN      | RRV      | AV       | OR       |
|-----|----------|----------|----------|----------|----------|----------|----------|
| SMV | 5.33E-12 | 7.80E-07 | 0.00E+00 | 2.66E-15 | 0.00E+00 | 0.00E+00 | 0.00E+00 |
| SRH |          | 7.62E-05 | 5.70E-14 | 1.77E-11 | 3.75E-11 | 1.36E-12 | 0.00E+00 |
| AS  |          |          | 1.97E-09 | 1.03E-09 | 0.00E+00 | 0.00E+00 | 5.55E-16 |
| SNC |          |          |          | 0.00E+00 | 0.00E+00 | 9.58E-07 | 0.00E+00 |
| CRN |          |          |          |          | 0.00E+00 | 0.00E+00 | 1.11E-16 |
| RRV |          |          |          |          |          | 0.00E+00 | 0.00E+00 |
| AV  |          |          |          |          |          |          | 1.30E-09 |

**Table S5. 2016 Region NMR p-value Matrix**

|     | SRH      | AS       | SNC      | CRN      | RRV      | AV       | OR       |
|-----|----------|----------|----------|----------|----------|----------|----------|
| SMV | 7.50E-07 | 0.00E+00 | 0.00E+00 | 0.00E+00 | 0.00E+00 | 3.86E-14 | 0.00E+00 |
| SRH |          | 0.00E+00 | 0.00E+00 | 1.70E-12 | 0.00E+00 | 0.00E+00 | 0.00E+00 |
| AS  |          |          | 0.00E+00 | 0.00E+00 | 0.00E+00 | 0.00E+00 | 0.00E+00 |
| SNC |          |          |          | 1.23E-08 | 0.00E+00 | 0.00E+00 | 0.00E+00 |
| CRN |          |          |          |          | 0.00E+00 | 0.00E+00 | 1.55E-15 |
| RRV |          |          |          |          |          | 0.00E+00 | 0.00E+00 |
| AV  |          |          |          |          |          |          | 0.00E+00 |

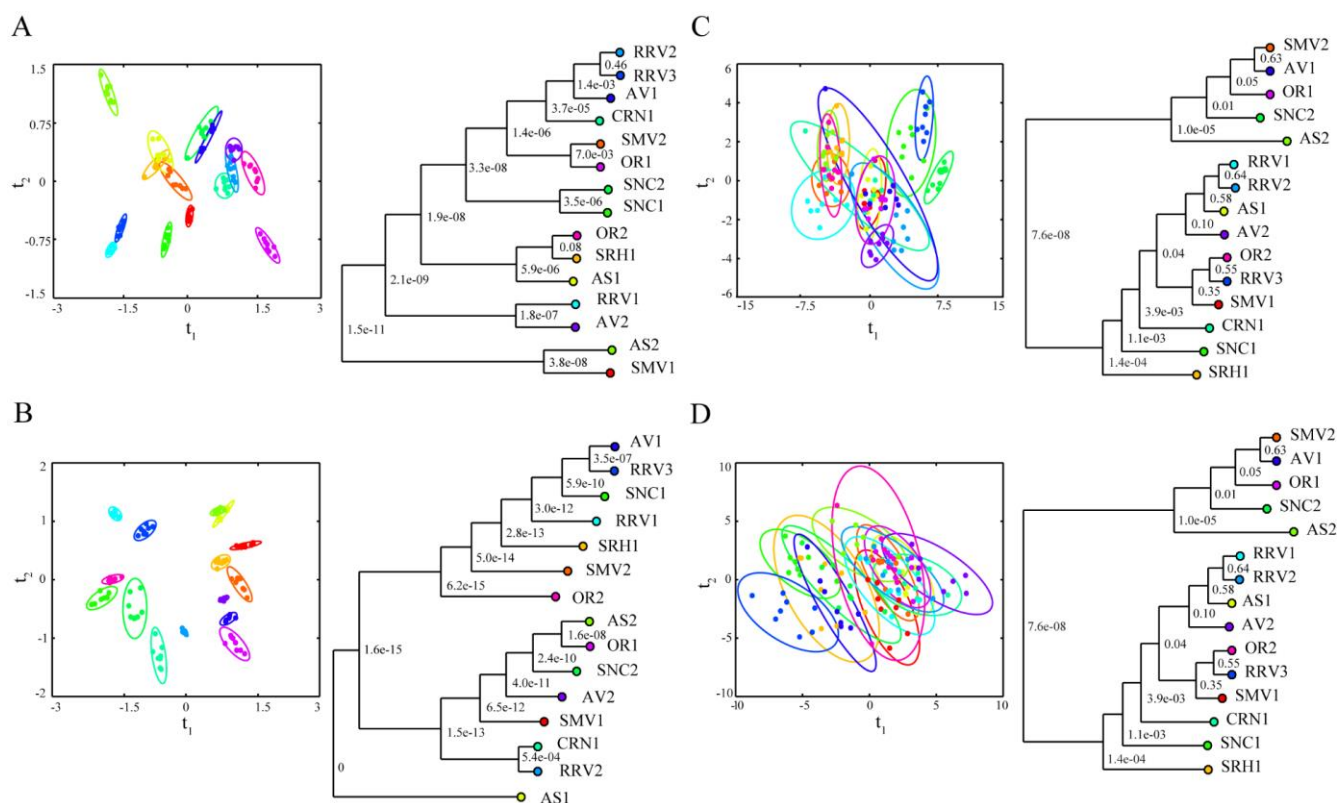

**Figure S1.** Multivariate Analysis of NMR and DS Array Datasets. LDA-PCA scores plots and associated dendrograms generated from the NMR (A) 2015 ( $R^2$  0.79,  $Q^2$  0.75) or (B) 2016 ( $R^2$  0.75,  $Q^2$  0.70) data sets. PCA scores plots and associated dendrograms generated from the DS array (C) 2015 ( $R^2$  0.78,  $Q^2$  0.72) or (D) 2016 ( $R^2$  0.62,  $Q^2$  0.52) data sets. LDA-PCA scores plot, PCA scores plots and dendrograms are displayed with color-coded groups labels, symbols and ellipses as defined in Figure 2. Ellipses represent the 95% confidence interval from a normal distribution. Each node of the dendrogram is labeled with a p-value based on Mahalanobis distances between the groups. LDA models are generated from the first four components of the PCA model.

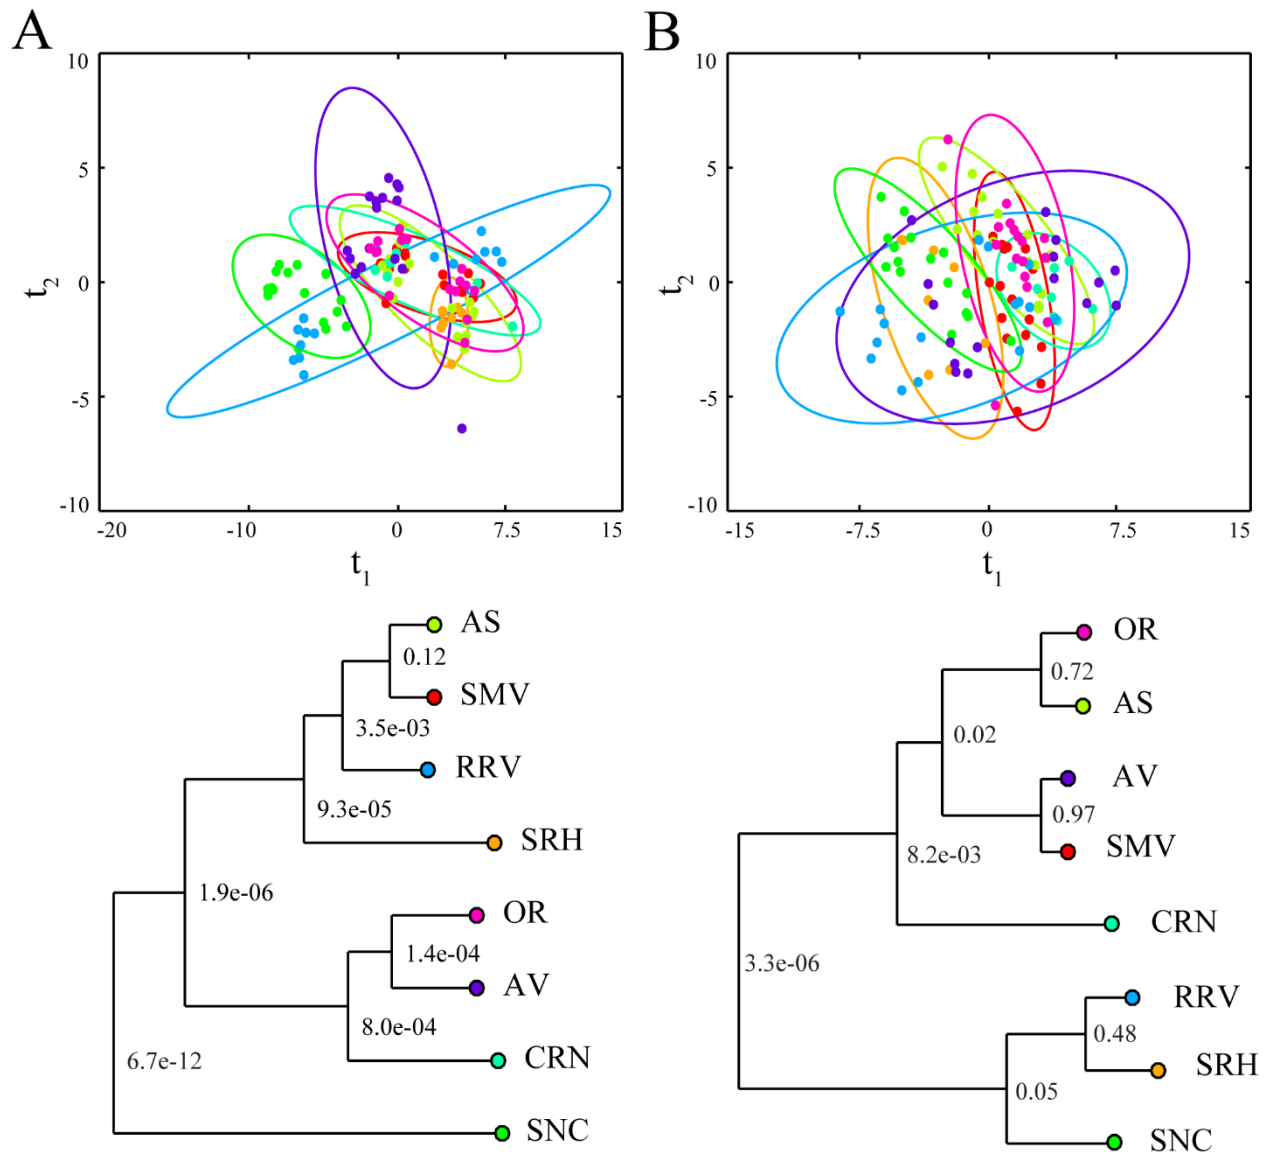

**Figure S2.** AVA Region Multivariate Analysis of DS Array Datasets. PCA scores plots and associated dendrograms generated from the DS array (A) 2015 ( $R^2$  0.88,  $Q^2$  0.754) or (B) 2016 ( $R^2$  0.63,  $Q^2$  0.52) data sets. PCA scores plots and dendrograms are displayed with color-coded groups labels, symbols and ellipses as defined in Figure 2. Ellipses represent the 95% confidence interval from a normal distribution. Each node of the dendrogram is labeled with a p-value based on Mahalanobis distances between the groups.



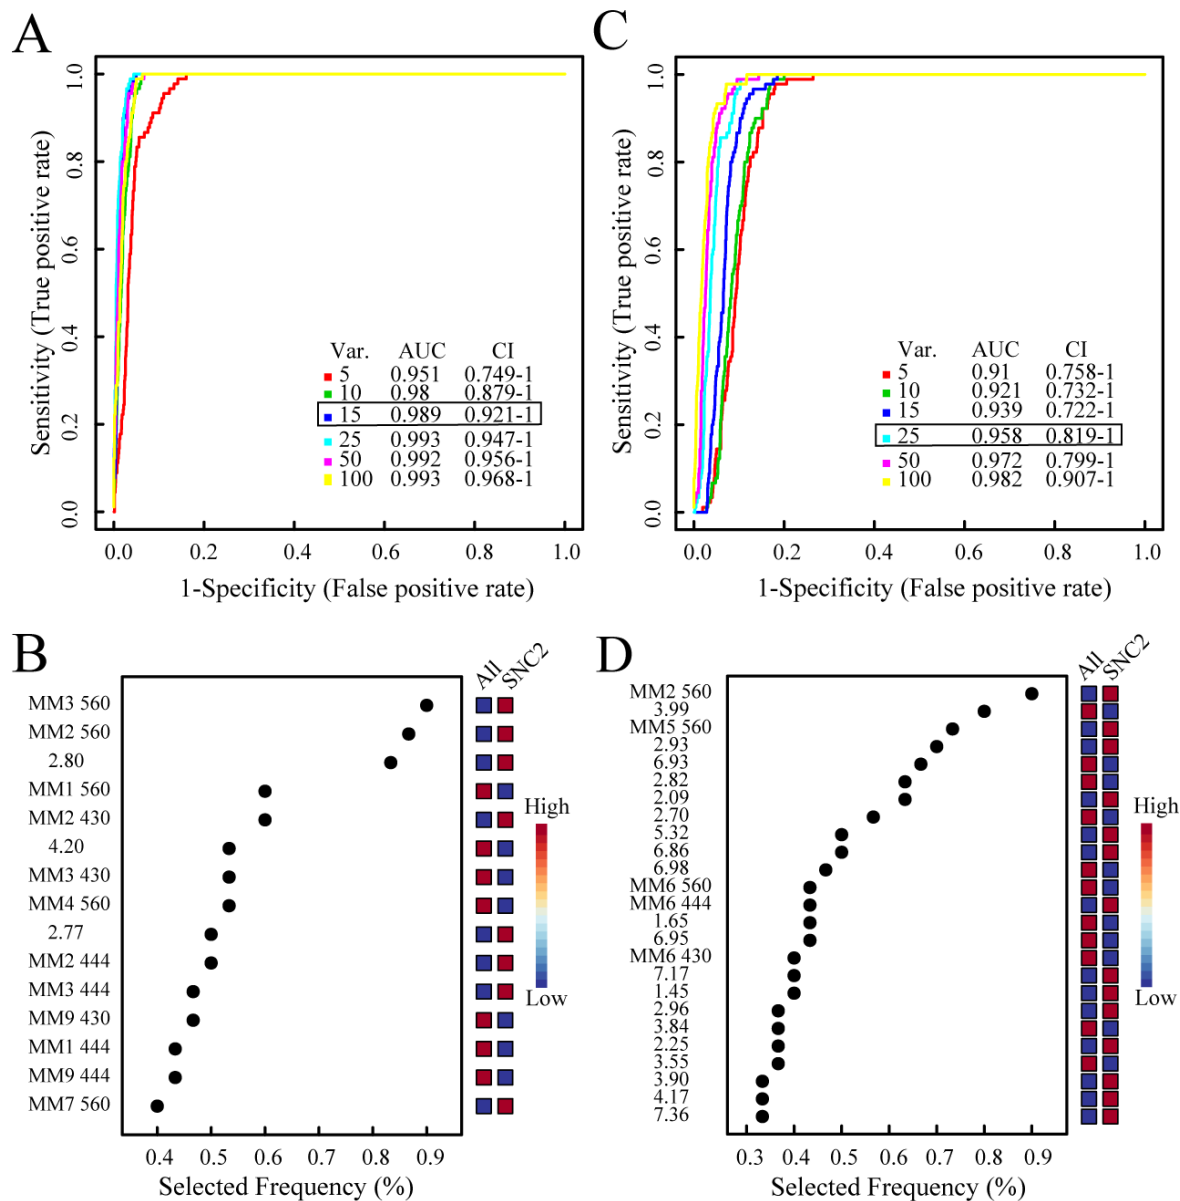

**Figure S3.** Vineyard and AVA Region Univariate Analysis. Representative ROC curves created from the combined NMR and DS array dataset for the SNC2 vineyard for the (A) 2015 and (C) 2016 vintages. The top 6 ROC curves are displayed with Area Under the Curve (AUC) and the confidence interval (CI) for all ROC curves indicated. The selected ROC curve is indicated by a box. The top NMR and DS array features that contribute to the ROC model for the (B) 2015 and (D) 2016 vintages are listed. The ROC curves were generated with MetaboAnalyst 4.0 (<https://www.metaboanalyst.ca/>) (Xia et al., 2015).

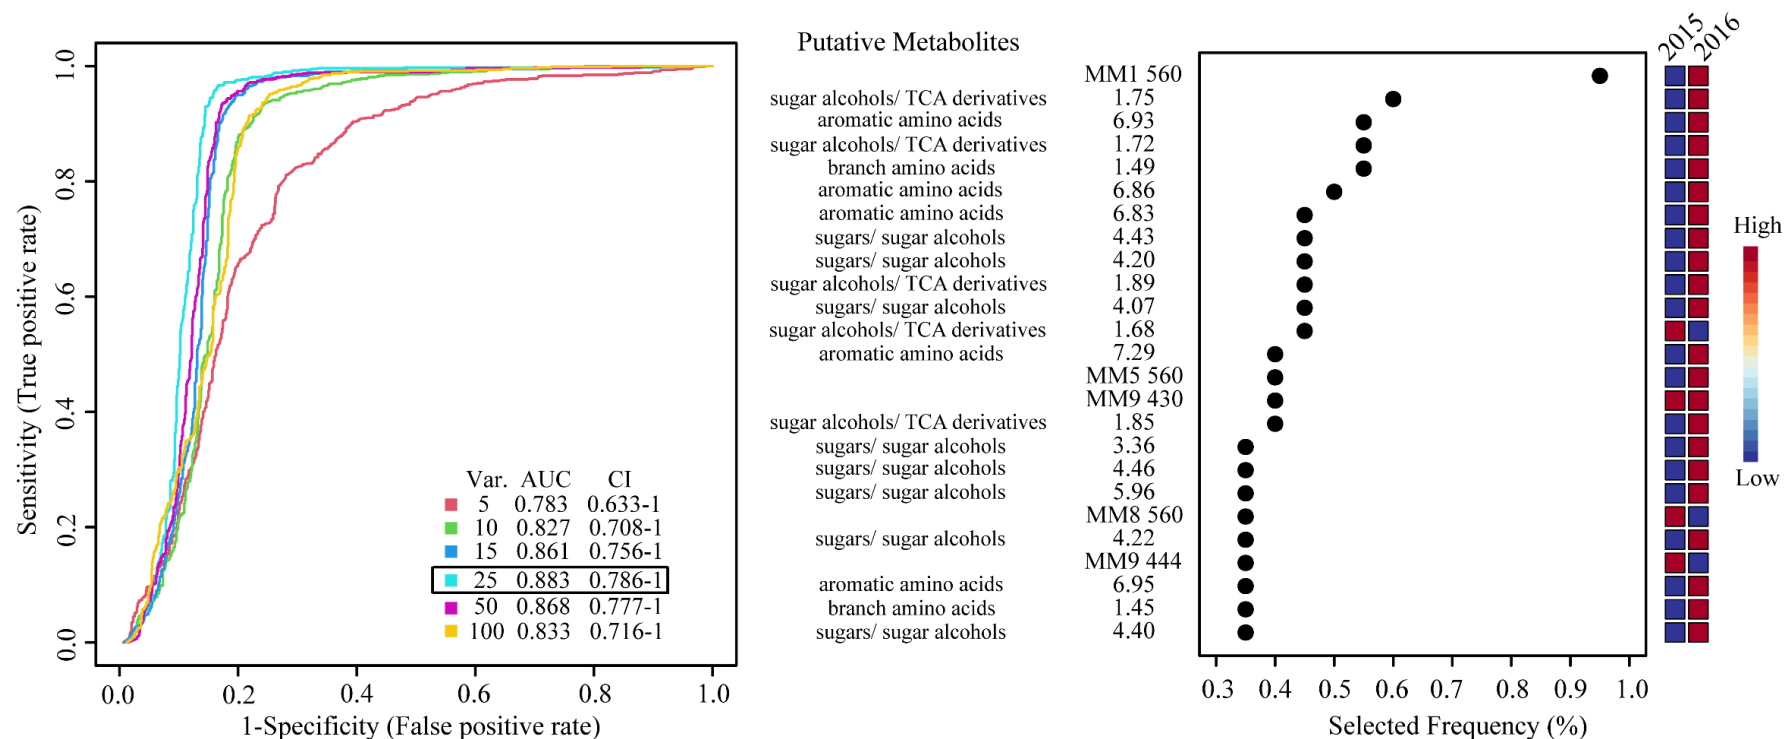

**Figure S4.** Vintage Univariate Analysis. (*left*) ROC curves created from the combined NMR and DS array dataset for the 2015 and 2016 vintage years. The top 6 ROC curves are displayed with Area Under the Curve (AUC) and the confidence interval (CI) for all ROC curves indicated. The selected ROC curve is indicated by a box. (*right*) The top NMR and DS array features that contribute to the ROC model are listed with (*middle*) putative metabolite class assignments. The ROC curves were generated with MetaboAnalyst 4.0 (<https://www.metaboanalyst.ca/>) (Xia et al., 2015).
